# Supplementary material
Source: PubMed Central journal article supplement (PMC3248538)
Supplement: 1117207108_pnas.1117207108_SI.pdf [file 1117207108_pnas.1117207108_SI.pdf]

# Supporting Information

Ryu et al. 10.1073/pnas.1117207108

## SI Text

**SI Materials and Methods. Human subjects.** Male subjects 21–35 y of age, weighing at least 50 kg, were recruited to participate. Details of the subject characteristics and exclusion criteria are provided in Table S1. The study was approved by both the Institutional Review Board and the Clinical Research Center of the University of Florida. All subjects provided written informed consent prior to enrollment. The study was registered at [clinicaltrials.gov](http://clinicaltrials.gov) as NCT01221129.

**Acute dietary zinc depletion.** The design was a 24-d study comprised of three phases of dietary treatment (Fig. 1A). Each subject served as their own control. In order to establish a defined baseline condition (acclimation) prior to dietary zinc depletion, subjects consumed meals composed of a mixed diet providing 2,700 kcal and approximately 11 mg Zn/d, and an adequate amount of a zinc-free energy supplement for additional calories required for body weight maintenance. After 7 d of acclimation (Day 7), the subjects consumed egg white-based liquid formula which provided <0.5 mg Zn/d for 10 d. The composition of caloric and mineral contents of the liquid formula are shown in Tables S7 and S8, respectively. Upon completion of the depletion phase (on Day 17), subjects returned to their self-selected diet and a supplement of 15 mg Zn/d was provided for the zinc repletion.

**Sample collection.** All samples were collected after an overnight fast between 7–7:30 a.m. On Day 7, 13, and 17, two buccal swabs and whole blood (34 mL) were collected in PAXgene, EDTA-, and heparin-treated tubes. Additional blood draws (5 mL) were conducted on Day 0 and at Day 10, Day 15, Day 20, and Day 24 for serum sampling. The scheme of sample handling and processing workflow is shown in Figure S3.

**Preparation of buccal RNA.** FTA paper cards (Whatman) with buccal samples were air-dried for approximately 3–4 h at room temperature and stored at  $-20^{\circ}\text{C}$  until processed. To isolate RNA, filter papers with the buccal samples were cut into small parts using sterile surgical scissors, and were incubated in 1.5 mL of TRI reagent (Ambion) at room temperature for 15 min. Samples were agitated every 5 min during this period. After centrifugation at  $12,000 \times g \times 30$  min,  $4^{\circ}\text{C}$ , the lysate was transferred to a new microcentrifuge tube for RNA isolation. When residual filter paper was observed in the RNA solution, samples were treated with 1 mL of TRI reagent and the phenol-chloroform extraction step was repeated. All samples were further purified by the sodium acetate-isopropanol precipitation, and the final RNA solution was stored at  $-80^{\circ}\text{C}$  until analyzed.

**Processing of blood samples.** Sera were isolated from 5 mL of whole blood collected in red-top serum tubes (BD Vacutainer). Blood was allowed to clot at room temperature for 60 min after collection, and placed on ice for no longer than 2 h until processed. Clotted blood was centrifuged at  $2,000 \times g \times 10$  min,  $4^{\circ}\text{C}$ , and serum was collected in aliquots. One aliquot was treated with 1% (vol/vol) protease inhibitor cocktail (Pierce) and stored at  $-80^{\circ}\text{C}$  for ELISA. Untreated samples were stored in  $4^{\circ}\text{C}$  and  $-80^{\circ}\text{C}$  until processed for atomic absorption spectrophotometry (AAS) and miRNA assays, respectively. For the determination of zinc concentrations by AAS, sera were diluted 1/4 with MilliQ

water. Consistency of measurements was monitored with a reference zinc standard (0.6 mg Zn/L).

PBMC and circulating erythroid cells (erythrocytes and reticulocytes) were fractionated from whole blood collected in Vacutainer tubes pretreated with  $\text{K}_3$  EDTA. For PBMC isolation, 9 mL of whole blood was placed on an equal vol of Histopaque 1077 (Sigma) and centrifuged at  $400 \times g \times 30$  min at room temperature. The PBMC layer was collected and washed with PBS at  $250 \times g \times 10$  min, twice. Recovered PBMCs were treated with 1 mL of TRI reagent for RNA isolation. The RBC pellet was diluted with 1 volume of PBS was stored at  $4^{\circ}\text{C}$  until processed for reticulocyte RNA preparation.

Remnant erythroid cells from the PBMC isolation procedure (with 9 mL of whole blood) were processed to yield a reticulocyte RNA preparation. To achieve a pure population of erythroid cells, leukocyte depletion was carried out by using cellulose columns (1). Enriched RBCs were suspended in 1 volume of HEPES buffer (154 mM NaCl, 10 mM HEPES, 1 g/L BSA) and filtered through a cellulose column composed of  $\alpha$ -cellulose (Sigma) and Sigmacell Type 50 microcrystalline cellulose (Sigma) in a 1:1 (wt:wt) ratio. After RBC preparations were loaded into the cellulose column, 2 volumes of HEPES buffer was applied for the elution of RBC. After being collected from the eluate by centrifugation at  $2,000 \times g \times 5$  min at  $4^{\circ}\text{C}$ , the cells were washed two times with an equal volume of ice-cold PBS at  $200 \times g$  for 10 min to eliminate platelets. Purified RBCs packed by centrifugation at  $2,000 \times g \times 5$  min at  $4^{\circ}\text{C}$  were treated with 20 mL of TRI reagent for reticulocyte RNA isolation and purification by the phenol-chloroform extraction and sodium acetate-isopropanol precipitation, respectively.

**Isolation and processing of blood cell RNA.** With the exception of RNA from whole blood collected in PAXgene tubes, all blood RNA samples were prepared by phenol-chloroform extraction, and were treated with Turbo DNA-free reagents (Ambion) to remove residual DNA contamination. For RNA isolated from samples of whole blood assays, additional RNA precipitation using 2.5 M lithium chloride (LiCl) was conducted to minimize the inhibitory effects of heparin on reverse transcription and PCR reactions (2). Stabilized whole blood RNA was prepared from 7.5 mL of blood collected in PAXgene blood collection tubes (BD) by the manual procedure described in the manufacturer's protocol. Briefly, whole blood lysates treated with proteinase K were homogenized and RNA was isolated by using silica-gel membrane columns (Qiagen). Samples were treated with DNase I (Qiagen) prior to elution.

Whole blood RNA from PAXgene samples was further processed to minimize the masking effect produced by the highly abundant transcript, globin RNA, prior to microarray analyses (3, 4). Globin RNA depletion from the whole blood RNA was done by using GLOBINclear (Ambion). Globin transcripts in PAXgene RNA (3  $\mu\text{g}$ ) was hybridized to biotinylated oligonucleotides and captured by streptavidin magnetic beads. The supernatant was further purified by a poly-T-oligos conjugated to magnetic beads prior to downstream processing for microarray analysis. All RNA samples were stored at  $-80^{\circ}\text{C}$  until further processed.

**Microarray experiments and data analysis.** The Illumina BeadChip platform (HumanHT-12 v4) was selected for the assessment of global effect of dietary zinc depletion on the blood transcriptome, due to its high-throughput and cost-effective nature. PAXgene

whole blood RNA with or without depletion of globin transcripts (200 ng of total RNA) was amplified by the Illumina TotalPrep RNA Amplification kit (Ambion) for the array analysis. Following reverse transcription using T7 Oligo(dT) primers and second strand cDNA synthesis, *in vitro* transcription with T7 RNA polymerase and biotin-UTP was conducted for the synthesis of biotinylated cRNA. The yield and quality of cRNA were assessed with the NanoDrop spectrophotometer and Agilent 2100 bioanalyzer, respectively. For the detection of differential gene expression, labeled cRNA (750 ng) was loaded to beadchips, hybridized for 16 h at 58 °C, and labeled with Cy3-streptavidin. Fluorescence signals from Cy3 were detected by a BeadArray Reader (Illumina Beadstation 500GX) and signal intensities were exported by using GenomeStudio software (Illumina).

Probes with detection *P*-values above 0.05 in all samples were excluded from the dataset prior to analyses. Raw data were quantile normalized and log-transformed for statistical analyses. Differentially expressed (DE) genes were determined by comparisons between baseline and post-zinc-depletion levels using BRB-ArrayTools (developed by Dr. Richard Simon and BRB-ArrayTools Development Team). Genes differentially affected by acute zinc depletion were determined by a pairwise comparison at  $P < 0.005$  with 256 available permutations. For the visualization of the temporal pattern of gene expression identified with pooled samples, intensity values were standardized by subtracting the mean value of each gene across all arrays and division by the standard deviation of each respective gene (resulting in mean = 0, standard deviation = 1). After unsupervised clustering by expression patterns using the *k*-means algorithm ( $k = 2$ ), computational analyses based on putative transcription factor motifs were conducted to identify the cis-regulatory factors mediating the differential expression of the zinc-responsive genes by PRIMA of the EXPANDER 5.2 software suite (5). PANTHER version 7 ([www.pantherdb.org](http://www.pantherdb.org)) (6) and Ingenuity Pathway Analysis (Ingenuity® Systems, [www.ingenuity.com](http://www.ingenuity.com)) with the list of DE genes was conducted to identify biological networks between the responsive genes and to predict the associated functions, diseases and disorders to the modulated gene expression by dietary zinc depletion. Genes with the potential to serve as a biomarker of zinc deficiency were determined by an unpaired comparison using the BRB-Array Tools ( $P < 0.005$  with 10,000 random permutations). Average-linkage hierarchical clustering with Pearson correlation metric was conducted with the EXPANDER software.

**Real-time quantitative PCR.** Transcript abundance of genes known to be directly involved in the regulation of cellular zinc homeostasis, i.e., zinc transporters (ZnT1, ZnT2, ZnT4, ZnT5, ZnT6, ZnT7, Zip1, Zip2, Zip4, Zip5, Zip8, Zip10, and Zip14) and MT, were measured by assays designed and validated previously (7, 8). Primers and probe sets for the detection of Zip6 (forward, 5'-AGGCTGGCATGACCGTTAAG-3'; reverse, 5'-AAAATTCCTGTTGCCATTCCA-3'; probe, 5'-FAM-CCTTTA-TAATGCATTGTCAGCCATGCTGG-BHQ1-3') and GAPDH transcripts (forward, 5'-GAAGGTGAAGGTCGGAGTC-3'; reverse, 5'-GAAGATGGTGATGGGATTTC-3'; probe, 5'-FAM-CAAGCTTCCCGTCTCAGCC-BHQ1-3') were designed by using PRIMER EXPRESS 3.0 software (Applied Biosystem) and validated by Primer3plus. Quantitation of CDC20, TXNDC5, MZB1, and IGJ transcripts were conducted using TaqMan gene expression assays from Applied Biosystems. Real-time quantitative reverse transcriptase polymerase chain reaction (qPCR) assays were done with cDNA, generated with high capacity cDNA reverse transcription kit (Applied Biosystems), and the TaqMan fast universal PCR master mix (Applied Biosystems). Glyceraldehyde 3-phosphate dehydrogenase (GAPDH) mRNA and 18S rRNA levels were measured as internal controls, and amplification and detection were performed with the StepOnePlus real-time PCR system (Applied Biosystems).

**Serum miRNA isolation and quantitation.** Serum was treated with 5 volumes of QIAzol (Qiagen) for the denaturation of protein contents and subsequent isolation of RNA. Due to the absence of a known housekeeping microRNA (miRNA) in human serum, 25 fmol of synthetic cel-miR-39 (5'-UCACCGGGUGUAAAU-CAGCUUG-3') was added as a means of normalization (9). After adding 1 volume of chloroform, aqueous and organic phases were separated by centrifugation at  $12,000 \times g \times 15$  min at 4 °C. The aqueous phase was treated with 1.5 volumes of 100% ethanol and loaded to a miRNeasy Mini column for RNA extraction. After extensive washes, purified RNA was eluted from the column membrane with 50  $\mu$ L of nuclease-free water and stored at -80 °C until analyzed.

The human serum miRNA PCR array from SABiosciences was used for the identification of circulating miRNAs responsive to dietary zinc levels. Serum RNA was isolated from 400  $\mu$ L of pooled sera (composed of 60  $\mu$ L of sera from  $n = 8$ ) at the initial screening step. Day 7, 17, and 24 samples were selected as those representing baseline, zinc-depleted, and zinc-repleted conditions, respectively. Serum RNA was polyadenylated and converted to cDNA by using RT<sup>2</sup> miRNA First Strand kit (SABiosciences) containing universal reverse transcription (RT) primers targeting poly-A-tails. After a 1/4-dilution with nuclease-free water, RT products were distributed across the miRNA qPCR arrays with SYBR Green qPCR reagents (SABiosciences) for amplification and quantitation. Melt-curve analyses with amplified products were conducted to determine the specificity of each primer set. All values of each miRNA were normalized to their respective cel-miR-39 and intergroup values were compared by the comparative  $C_T$  method. Criteria for determining the zinc-responsive miRNAs were: (i) single melting temperature, (ii) fold-change > 1.5 by dietary zinc depletion, (iii) threshold cycle ( $C_T$ ) < 35, and (iv) response to zinc repletion in a direction opposite to that of zinc-depletion.

Zinc-responsiveness of selected miRNA, identified in pooled samples, was confirmed with RNA from 200  $\mu$ L of individual serum samples collected at Day 7, 13, 17, 20, and 24 by using the miScript PCR system (Qiagen). Total serum RNA was isolated as described above. Target miRNAs were selected based on their average  $C_T$  values and fold-changes obtained from the PCR array experiment. All miRNA with a detection  $C_T$  lower than 30 and fold-changes above 1.5 by both zinc depletion and repletion (miR-10b, 92a, -145, -375) were analyzed by miRNA-specific qPCR assays. Among miRNAs with  $C_T$  between 30 and 35, those with responses greater than 2-folds (miR-200b, miR-204, and 296-5p) were selected for further confirmation. After ligation-mediated reverse transcription with 5  $\mu$ L of the eluted RNA using the miScript Reverse Transcription reagents (20  $\mu$ L of total reaction volume; Qiagen), cDNA products were diluted with four volumes of nuclease-free water. qPCR was conducted in a final reaction volume of 12  $\mu$ L with 1.2  $\mu$ L of the diluted cDNA templates using the SYBR Green PCR chemistry. Relevant primers compatible to the miScript system were purchased from Qiagen. All values of miRNA qPCR experiments were normalized to the abundance of their respective cel-miR-39 value and the average of Day 7 samples were set at 1 for comparison.

**Cytokine assays.** Whole blood was collected in heparin, diluted to 20% with phenol-free RPMI-1640 medium supplemented with 2 mM L-glutamine, 100 U penicillin/mL and 100  $\mu$ g streptomycin/mL, with or without LPS (1 mg/L) or PHA (10 mg/L). After incubation in wells of ultra-low-attachment plates (Corning) at 37 °C in 5% CO<sub>2</sub> for 24 h, cell-free supernatant was collected by centrifugation at  $600 \times g \times 5$  min, 4 °C, and stored with protease inhibitor cocktail (Pierce) at -80 °C. Whole blood cell pellets were lysed with TRI reagent BD (Molecular Research Center) supplemented with acetic acid, and stored at -80 °C until RNA isolation. Inflammatory cytokine levels in

cell-free supernatants were measured using a multianalyte ELISA array (SABiosciences) with pooled samples. Effects on IL-1 $\beta$ , TNF $\alpha$ , and IFN $\gamma$  were further assessed with cell-free supernatants from individual subjects using single analyte ELISAs (SABiosciences). Analytes were quantified by absorbance at 450 nm using a multimode microplate reader (SpectraMax M5; Molecular Devices).

**Statistical analysis.** A dataset from nine subjects is adequate to detect a within-subject difference in transcript levels of zinc-respon-

sive gene with 80% power at  $P < 0.05$  two-sided. Values from samples of Day 7 served as the control for comparisons. Student's  $t$ -test or repeated measures of ANOVA followed by a Student-Newman-Keuls multiple comparisons test were conducted for pairwise comparisons. Linear association between transcript levels and serum zinc concentrations was determined by the Pearson correlation coefficient. All statistical analyses were conducted using the InStat 3 software (GraphPad). The level of significance was set at  $P < 0.05$  for all analyses except for those of microarray data.

- Bonafoux B, Combes T (2009) Serial analysis of gene expression adapted for down-sized extracts (SAGE/SADE) analysis in reticulocytes. *Methods Mol Biol* 496:299–311.
- Jung R, Lubcke C, Wagener C, Neumaier M (1997) Reversal of RT-PCR inhibition observed in heparinized clinical specimens. *Biotechniques* 23(1):24–28.
- Tian Z, et al. (2009) A practical platform for blood biomarker study by using global gene expression profiling of peripheral whole blood. *PLoS One* 4(4):e5157.
- Debey S, et al. (2006) A highly standardized, robust, and cost-effective method for genome-wide transcriptome analysis of peripheral blood applicable to large-scale clinical trials. *Genomics* 87(5):653–664.
- Ulitsky I, et al. (2010) Expander: From expression microarrays to networks and functions. *Nat Protoc* 5(2):303–322.
- Thomas PD, et al. (2003) PANTHER: A library of protein families and subfamilies indexed by function. *Genome Res* 13(9):2129–2141.
- Cousins RJ, et al. (2003) A global view of the selectivity of zinc deprivation and excess on genes expressed in human THP-1 mononuclear cells. *Proc Natl Acad Sci USA* 100(12):6952–6957.
- Aydemir TB, Blanchard RK, Cousins RJ (2006) Zinc supplementation of young men alters metallothionein, zinc transporter, and cytokine gene expression in leukocyte populations. *Proc Natl Acad Sci USA* 103(6):1699–1704.
- Kroh EM, Parkin RK, Mitchell PS, Tewari M (2010) Analysis of circulating microRNA biomarkers in plasma and serum using quantitative reverse transcription-PCR (qRT-PCR). *Methods* 50(4):298–301.

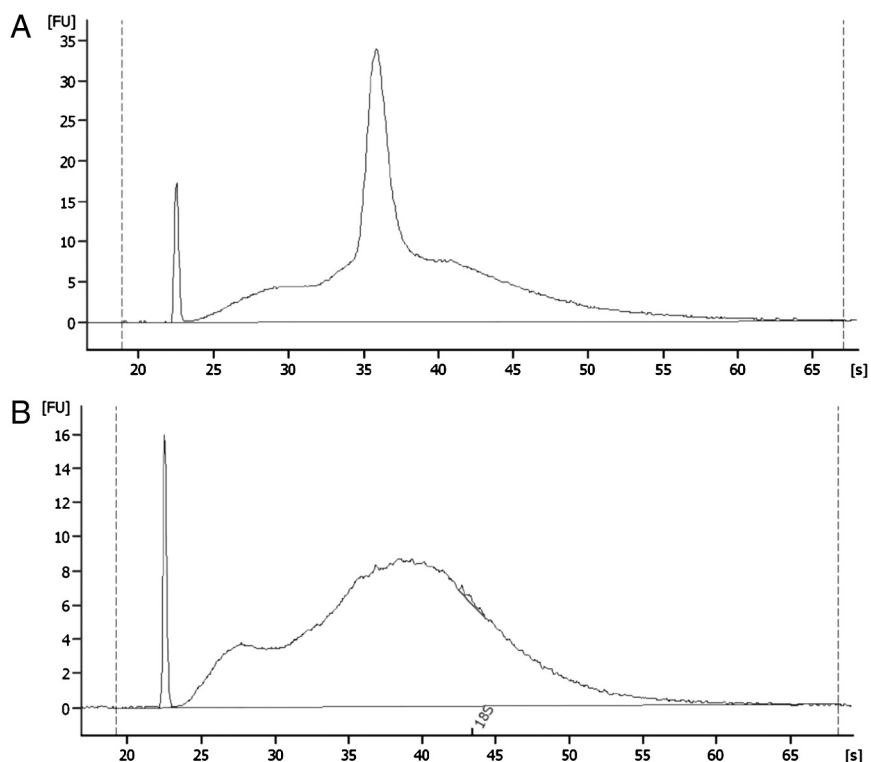

**Fig. S1.** Quality of amplified cRNA assessed by Agilent 2100 Bioanalyzer. Representative electropherogram of amplified (A) whole blood RNA (PAX) and (B) globin RNA-reduced whole blood RNA (GRP) are shown. The peak only present in the electropherogram of PAX indicates the highly abundant globin RNA content. Removal of this peak was confirmed by all globin RNA-reduced samples.

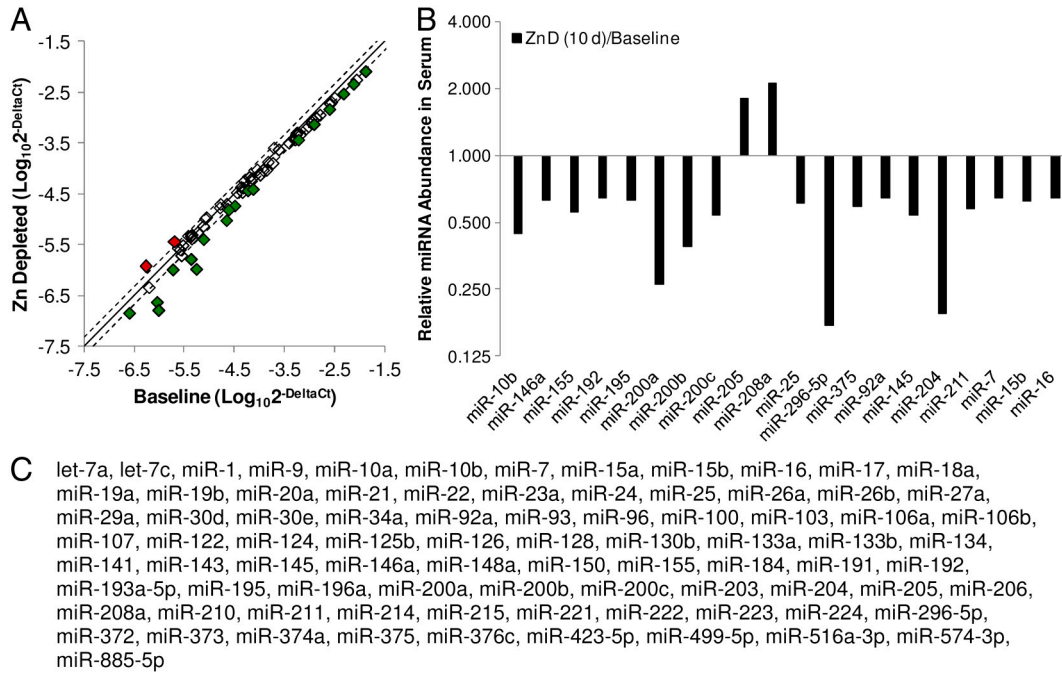

**Fig. 52.** Identification of serum miRNAs responsive to acute dietary zinc depletion using a qPCR-based array. Circulating miRNA were isolated from pooled sera collected on baseline (day 7) and postdepletion phase (day 17), and were quantified by using a SABiosciences human serum miRNA qPCR array (MAH-106A) focused on miRNA known to be present in human serum. (A) A scatter plot indicating the miRNA of which levels were modulated by fold changes above 1.5 under dietary zinc restriction. (B) Relative abundance of serum miRNAs affected by dietary zinc depletion. Values were normalized to cel-miR-39 levels. (C) List of miRNAs on the array.

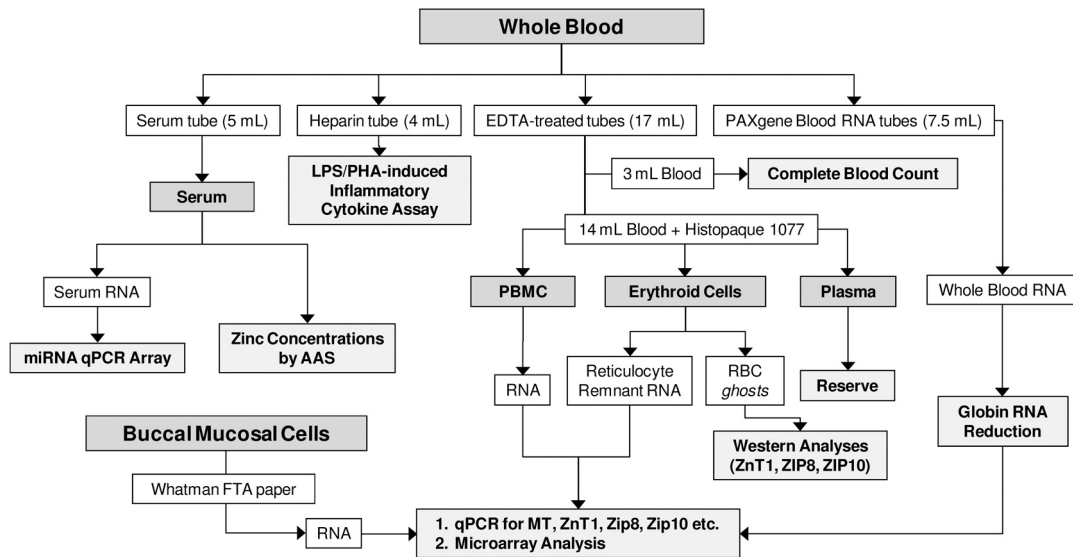

**Fig. 53.** Schematic diagram of sample collection and handling processes. Relevant materials and methods were selected based on their practicality for being used in the field for nutrient assessment. Availability of methods for sample stabilization allowed the completion of the entire processing by a single researcher. Data from with erythrocyte membrane fractions will be presented elsewhere.

**Table S1. Subject characteristics (n = 9). Exclusion criteria for the dietary regimen included current cigarette smoking, alcohol abuse, routine consumption of medications, chronic use of denture cream or dietary supplements containing zinc, and history of any chronic disease or allergic reaction. Upon enrollment, the zinc contents in the habitual diet of each subject were determined by a 24-h diet recall followed by calculations with the Nutrition Data System for Research (NDSR) and blood was collected for serum zinc measures by atomic absorption spectrophotometry**

| Day of study                  | Screening<br>Mean (SD) | Day 0<br>Mean (SD)       | Day 7<br>Mean (SD)      | Day 17<br>Mean (SD)      | Day 24<br>Mean (SD)      |
|-------------------------------|------------------------|--------------------------|-------------------------|--------------------------|--------------------------|
| Age (y)                       | 24 (2)                 | —                        | —                       | —                        | —                        |
| Height (cm)                   | 173.9 (6.6)            | —                        | —                       | —                        | —                        |
| BWt (kg)                      | 77.1 (12.5)            | 77.3 (12.7)              | 76.7 (12.6)             | 76.3 (11.8)              | 76.8 (11.5)              |
| Caloric needs (kcal/d)        | 3043 (193)             | —                        | —                       | —                        | —                        |
| Serum Zn ( $\mu\text{g/dL}$ ) | 91.9 (17.9)            | 83.9 (16.6) <sup>a</sup> | 86.6 (8.1) <sup>a</sup> | 69.1 (13.4) <sup>b</sup> | 83.5 (12.7) <sup>a</sup> |
| 24 h recall (mg Zn/d)         | 13.9 (7.3)             | —                        | —                       | —                        | —                        |

Values with different superscript are significant at  $P < 0.001$ .

**Table S2. Hematological parameters measured during dietary zinc depletion (n = 9)**

| Measures                                     | Normal range | Day of study  |                            |                            |           |        |  |
|----------------------------------------------|--------------|---------------|----------------------------|----------------------------|-----------|--------|--|
|                                              |              | Day 7         |                            | Day 13                     |           | Day 17 |  |
|                                              |              | Mean (SD)     | Mean (SD)                  | Mean (SD)                  | Mean (SD) |        |  |
| WBC ( $\times 10^3/\text{mm}^3$ )            | 4.0 ~ 10.0   | 5.88 (1.48)   | 5.88 (1.45)                | 5.82 (1.51)                |           |        |  |
| Hemoglobin (g/dL)                            | 13.0 ~ 16.5  | 15.77 (0.93)  | 15.20 (0.82) <sup>3</sup>  | 15.13 (0.73) <sup>‡</sup>  |           |        |  |
| Hematocrit (%)                               | 39.0 ~ 49.0  | 44.52 (2.43)  | 43.37 (2.12)               | 42.53 (2.28) <sup>‡</sup>  |           |        |  |
| Platelet count ( $\times 10^3/\text{mm}^3$ ) | 150 ~ 450    | 282.22 (31.1) | 265.56 (34.4) <sup>‡</sup> | 251.78 (39.7) <sup>‡</sup> |           |        |  |
| RBC ( $\times 10^6/\text{mm}^3$ )            | 4.5 ~ 5.9    | 5.36 (0.48)   | 5.21 (0.46) <sup>‡</sup>   | 5.11 (0.42) <sup>‡</sup>   |           |        |  |
| Mean cell volume (micron <sup>3</sup> )      | 78.0 ~ 100.0 | 83.48 (5.37)  | 83.71 (5.41)               | 83.46 (5.45)               |           |        |  |
| Mean cell Hemoglobin (pg)                    | 26.0 ~ 34.0  | 29.53 (2.10)  | 29.32 (1.78)               | 29.68 (1.67)               |           |        |  |
| MCHC (g/dL)*                                 | 31 ~ 37      | 35.36 (0.79)  | 35.04 (0.71)               | 35.60 (1.17)               |           |        |  |
| CHCM (g/dL) <sup>†</sup>                     | 32.0 ~ 38.0  | 36.23 (1.23)  | 35.52 (1.10) <sup>‡</sup>  | 36.22 (1.49)               |           |        |  |
| RBC Distance Width (%)                       | 11.0 ~ 14.0  | 13.00 (1.26)  | 13.13 (1.26)               | 12.82 (1.29)               |           |        |  |
| Mean platelet volume (fL)                    | 6.0 ~ 10.0   | 7.97 (0.40)   | 8.11 (0.87)                | 8.92 (0.62) <sup>‡</sup>   |           |        |  |

\*MCHC, mean corpuscular hemoglobin concentration.

<sup>†</sup>CHCM, cell hemoglobin concentration mean.

<sup>‡</sup>Values significantly different compared to Day 7 values at  $P < 0.05$ .

**Table S3. List of differentially expressed genes ranked by fold-changes (ZnD/Baseline)\***

| Gene symbol              | EntrezID | Gene name                                                                                 | Fold-change | P-value  |
|--------------------------|----------|-------------------------------------------------------------------------------------------|-------------|----------|
| Up-regulated genes (192) |          |                                                                                           |             |          |
| LOC651751                | 651751   | similar to Ig kappa chain V-II region RPM1 6410 precursor                                 | 4.32        | <1e-07   |
| IGJ                      | 3512     | immunoglobulin J polypeptide, linker protein for immunoglobulin alpha and mu polypeptides | 4.22        | 1.00E-06 |
| LOC649923                | 649923   | similar to Ig gamma-2 chain C region                                                      | 3.51        | 3.00E-07 |
| LOC642113                | 642113   | Ig kappa chain V-III region HAH-like                                                      | 3.05        | <1e-07   |
| LOC652493                | 652493   | ig kappa chain V-I region HK102-like                                                      | 3.05        | 6.00E-07 |
| LOC647450                | 647450   | similar to Ig kappa chain V-I region HK101 precursor                                      | 2.87        | 3.00E-07 |
| LOC647506                | 647506   | similar to Ig kappa chain V-I region HK101 precursor                                      | 2.77        | 9.00E-07 |
| IGLL1                    | 3543     | immunoglobulin lambda-like polypeptide 1                                                  | 2.77        | 1.00E-06 |
| TXNDC5                   | 81567    | thioredoxin domain containing 5 (endoplasmic reticulum)                                   | 2.73        | 5.00E-07 |
| CDC20                    | 991      | cell division cycle 20 homolog (S. cerevisiae)                                            | 2.69        | 2.00E-07 |
| TNFRSF17                 | 608      | tumor necrosis factor receptor superfamily, member 17                                     | 2.55        | 1.85E-05 |
| GLDC                     | 2731     | glycine dehydrogenase (decarboxylating)                                                   | 2.49        | 2.30E-06 |
| LOC652102                | 652102   | similar to Ig heavy chain V-I region HG3 precursor                                        | 2.46        | 1.07E-03 |
| MZB1                     | 51237    | marginal zone B and B1 cell-specific protein                                              | 2.07        | 7.00E-07 |
| CD38                     | 952      | CD38 molecule                                                                             | 2.03        | 2.07E-05 |
| ABC89                    | 23457    | ATP-binding cassette, subfamily B (MDR/TAP), member 9                                     | 1.85        | 2.20E-06 |
| IGLL3                    | 91353    | immunoglobulin lambda-like polypeptide 3, pseudogene                                      | 1.85        | 1.12E-04 |
| LOC652775                | 652775   | similar to Ig kappa chain V-V region L7 precursor                                         | 1.81        | 1.49E-03 |
| LOC649210                | 649210   | similar to Ig lambda chain V region 4A precursor                                          | 1.73        | 3.13E-03 |
| CCNB2                    | 9133     | cyclin B2                                                                                 | 1.70        | 1.82E-05 |
| ITM2C                    | 81618    | integral membrane protein 2C                                                              | 1.70        | 2.23E-05 |
| ABCA1                    | 19       | ATP-binding cassette, subfamily A (ABC1), member 1                                        | 1.69        | 6.10E-06 |
| GPRC5D                   | 55507    | G protein-coupled receptor, family C, group 5, member D                                   | 1.67        | 2.20E-05 |
| UBE2C                    | 11065    | ubiquitin-conjugating enzyme E2C                                                          | 1.59        | 4.40E-06 |
| NLRP7                    | 199713   | NLR family, pyrin domain containing 7                                                     | 1.51        | 8.19E-05 |
| LOC728741                | 728741   | hypothetical LOC728741                                                                    | 1.50        | 1.18E-05 |
| APOBEC3B                 | 9582     | apolipoprotein B mRNA editing enzyme, catalytic polypeptide-like 3B                       | 1.49        | 7.27E-04 |

| Gene symbol  | EntrezID  | Gene name                                                                                                        | Fold-change | P-value  |
|--------------|-----------|------------------------------------------------------------------------------------------------------------------|-------------|----------|
| LOC652694    | 652694    | similar to Ig kappa chain V-I region HK102 precursor                                                             | 1.46        | 2.59E-03 |
| AURKB        | 9212      | aurora kinase B                                                                                                  | 1.45        | 4.97E-05 |
| TYMS         | 7298      | thymidylate synthetase                                                                                           | 1.44        | 1.90E-04 |
| CDC45        | 113130    | cell division cycle associated 5                                                                                 | 1.43        | 6.91E-05 |
| LOC651612    | 651612    | hypothetical protein LOC651612                                                                                   | 1.43        | 2.60E-03 |
| POU2AF1      | 5450      | POU class 2 associating factor 1                                                                                 | 1.42        | 7.50E-06 |
| SORL1        | 6653      | sortilin-related receptor, L(DLR class) A repeats containing                                                     | 1.42        | 1.65E-03 |
| HSP90B1      | 7184      | heat shock protein 90kDa beta (Grp94), member 1                                                                  | 1.42        | 1.80E-03 |
| HS.520591    | —         | —                                                                                                                | 1.42        | 1.87E-03 |
| SEMA4A       | 64218     | sema domain, immunoglobulin domain (Ig), transmembrane domain (TM) and short cytoplasmic domain, (semaphorin) 4A | 1.42        | 3.48E-03 |
| TNFRSF13B    | 23495     | tumor necrosis factor receptor superfamily, member 13B                                                           | 1.41        | 2.69E-04 |
| TK1          | 7083      | thymidine kinase 1, soluble                                                                                      | 1.40        | 3.14E-04 |
| CDC45L       | 8318      | cell division cycle 45 homolog (S. cerevisiae)                                                                   | 1.40        | 3.64E-04 |
| FKBP11       | 51303     | FK506 binding protein 11, 19 kDa                                                                                 | 1.40        | 3.75E-04 |
| RRBP1        | 6238      | ribosome binding protein 1 homolog 180kDa (dog)                                                                  | 1.37        | 3.25E-05 |
| TOP2A        | 7153      | topoisomerase (DNA) II alpha 170kDa                                                                              | 1.36        | 9.93E-05 |
| NT5DC2       | 64943     | 5'-nucleotidase domain containing 2                                                                              | 1.36        | 2.83E-04 |
| NCAPG        | 64151     | non-SMC condensin I complex, subunit G                                                                           | 1.36        | 1.76E-03 |
| BIK          | 638       | BCL2-interacting killer (apoptosis-inducing)                                                                     | 1.35        | 6.90E-04 |
| SDF2L1       | 23753     | stromal cell-derived factor 2-like 1                                                                             | 1.35        | 9.31E-04 |
| F5           | 2153      | coagulation factor V (proaccelerin, labile factor)                                                               | 1.35        | 4.48E-03 |
| UHRF1        | 29128     | ubiquitin-like with PHD and ring finger domains 1                                                                | 1.34        | 3.62E-05 |
| C19ORF10     | 56005     | chromosome 19 open reading frame 10                                                                              | 1.34        | 4.20E-05 |
| LOC100131727 | 100131727 | hypothetical protein LOC100131727                                                                                | 1.34        | 2.55E-04 |
| SLC35A5      | 55032     | solute carrier family 35, member A5                                                                              | 1.33        | 1.09E-04 |
| CAMK1G       | 57172     | calcium/calmodulin-dependent protein kinase IG                                                                   | 1.33        | 1.17E-04 |
| IRF4         | 3662      | interferon regulatory factor 4                                                                                   | 1.32        | 8.50E-06 |
| DENND5B      | 160518    | DENN/MADD domain containing 5B                                                                                   | 1.32        | 5.83E-05 |
| CCNA2        | 890       | cyclin A2                                                                                                        | 1.32        | 9.85E-04 |
| ASAP1IT1     | 29065     | ASAP1 intronic transcript 1 (nonprotein coding)                                                                  | 1.32        | 4.13E-03 |
| LOC100129905 | 100129905 | ribosomal protein S27 pseudogene 19                                                                              | 1.31        | 4.40E-03 |
| PTTG3P       | 26255     | pituitary tumor-transforming 3, pseudogene                                                                       | 1.30        | 9.10E-05 |
| SLC38A10     | 124565    | solute carrier family 38, member 10                                                                              | 1.29        | 3.94E-05 |
| GMPPB        | 29925     | GDP-mannose pyrophosphorylase B                                                                                  | 1.29        | 5.78E-05 |
| BUB1         | 699       | budding uninhibited by benzimidazoles 1 homolog (yeast)                                                          | 1.29        | 2.83E-03 |
| OXCT2        | 64064     | 3-oxoacid CoA transferase 2                                                                                      | 1.28        | 5.21E-05 |
| MCM4         | 4173      | minichromosome maintenance complex component 4                                                                   | 1.28        | 1.69E-04 |
| PHGDH        | 26227     | phosphoglycerate dehydrogenase                                                                                   | 1.28        | 2.84E-04 |
| BIRC5        | 332       | baculoviral IAP repeat containing 5                                                                              | 1.28        | 4.18E-04 |
| TLN1         | 7094      | talin 1                                                                                                          | 1.28        | 1.36E-03 |
| HS.184721    | —         | —                                                                                                                | 1.28        | 2.49E-03 |
| LOC441124    | 441124    | hypothetical gene supported by AK093729; BX647918                                                                | 1.28        | 4.58E-03 |
| CKAP4        | 10970     | cytoskeleton-associated protein 4                                                                                | 1.28        | 4.78E-03 |
| CCR9         | 10803     | chemokine (C-C motif) receptor 9                                                                                 | 1.27        | 5.30E-06 |
| PDIA5        | 10954     | protein disulfide isomerase family A, member 5                                                                   | 1.27        | 2.36E-04 |
| COL18A1      | 80781     | collagen, type XVIII, alpha 1                                                                                    | 1.27        | 2.42E-03 |
| ABCG1        | 9619      | ATP-binding cassette, subfamily G (WHITE), member 1                                                              | 1.26        | 1.69E-05 |
| SLC2A5       | 6518      | solute carrier family 2 (facilitated glucose/fructose transporter), member 5                                     | 1.26        | 3.11E-04 |
| MTF1         | 4520      | metal-regulatory transcription factor 1                                                                          | 1.26        | 7.35E-04 |
| CDT1         | 81620     | chromatin licensing and DNA replication factor 1                                                                 | 1.26        | 2.07E-03 |
| STT3A        | 3703      | STT3, subunit of the oligosaccharyltransferase complex, homolog A (S. cerevisiae)                                | 1.25        | 1.59E-04 |
| TRAM2        | 9697      | translocation associated membrane protein 2                                                                      | 1.25        | 4.94E-04 |
| AURKA        | 6790      | aurora kinase A                                                                                                  | 1.25        | 6.78E-04 |
| HS.157344    | —         | —                                                                                                                | 1.25        | 9.78E-04 |
| POLR2A       | 5430      | polymerase (RNA) II (DNA directed) polypeptide A, 220kDa                                                         | 1.25        | 2.00E-03 |
| LOC642131    | 642131    | putative V-set and immunoglobulin domain-containing protein 6-like                                               | 1.25        | 3.01E-03 |
| SPC24        | 147841    | SPC24, NDC80 kinetochore complex component, homolog (S. cerevisiae)                                              | 1.25        | 4.41E-03 |
| DLGAP5       | 9787      | discs, large (Drosophila) homolog-associated protein 5                                                           | 1.24        | 1.57E-03 |
| NUSAP1       | 51203     | nucleolar and spindle associated protein 1                                                                       | 1.24        | 2.92E-03 |
| UBE2J1       | 51465     | ubiquitin-conjugating enzyme E2, J1 (UBC6 homolog, yeast)                                                        | 1.23        | 2.68E-05 |
| HS.352677    | —         | —                                                                                                                | 1.23        | 1.85E-04 |
| TRIP13       | 9319      | thyroid hormone receptor interactor 13                                                                           | 1.23        | 6.14E-04 |
| WAS          | 7454      | Wiskott-Aldrich syndrome (eczema-thrombocytopenia)                                                               | 1.23        | 1.20E-03 |
| ARID3A       | 1820      | AT rich interactive domain 3A (BRIGHT-like)                                                                      | 1.23        | 1.82E-03 |
| CENPM        | 79019     | centromere protein M                                                                                             | 1.23        | 2.48E-03 |
| UBA1         | 7317      | ubiquitin-like modifier activating enzyme 1                                                                      | 1.23        | 3.30E-03 |
| BMP8B        | 656       | bone morphogenetic protein 8b                                                                                    | 1.22        | 6.65E-04 |
| SPATS2       | 65244     | spermatogenesis associated, serine-rich 2                                                                        | 1.22        | 8.57E-04 |
| SLC12A9      | 56996     | solute carrier family 12 (potassium/chloride transporters), member 9                                             | 1.22        | 9.20E-04 |

| Gene symbol  | EntrezID  | Gene name                                                                                                                                             | Fold-change | P-value  |
|--------------|-----------|-------------------------------------------------------------------------------------------------------------------------------------------------------|-------------|----------|
| SLC1A4       | 6509      | solute carrier family 1 (glutamate/neutral amino acid transporter), member 4                                                                          | 1.22        | 1.23E-03 |
| TXNDC11      | 51061     | thioredoxin domain containing 11                                                                                                                      | 1.22        | 2.23E-03 |
| LOC440348    | 440348    | nuclear pore complex interacting protein-like 2                                                                                                       | 1.22        | 2.37E-03 |
| HJURP        | 55355     | Holliday junction recognition protein                                                                                                                 | 1.22        | 3.25E-03 |
| ZNF341       | 84905     | zinc finger protein 341                                                                                                                               | 1.22        | 3.44E-03 |
| ZYX          | 7791      | zyxin                                                                                                                                                 | 1.22        | 4.32E-03 |
| LOC100128269 | 100128269 | hypothetical LOC100128269                                                                                                                             | 1.22        | 4.94E-03 |
| ZBTB43       | 23099     | zinc finger and BTB domain containing 43                                                                                                              | 1.21        | 4.85E-04 |
| KIF1B        | 23095     | kinesin family member 1B                                                                                                                              | 1.21        | 7.65E-04 |
| SNORA11B     | 100124539 | small nucleolar RNA, H/ACA box 11B (retrotransposed)                                                                                                  | 1.21        | 9.37E-04 |
| KIF2C        | 11004     | kinesin family member 2C                                                                                                                              | 1.21        | 9.41E-04 |
| MAGT1        | 84061     | magnesium transporter 1                                                                                                                               | 1.21        | 1.14E-03 |
| PRR11        | 55771     | proline rich 11                                                                                                                                       | 1.21        | 1.35E-03 |
| MCM2         | 4171      | minichromosome maintenance complex component 2                                                                                                        | 1.21        | 1.71E-03 |
| ALOX5        | 240       | arachidonate 5-lipoxygenase                                                                                                                           | 1.21        | 2.62E-03 |
| TCF4         | 6925      | transcription factor 4                                                                                                                                | 1.21        | 2.93E-03 |
| NARF         | 26502     | nuclear prelamin A recognition factor                                                                                                                 | 1.21        | 3.63E-03 |
| SORT1        | 6272      | sortilin 1                                                                                                                                            | 1.21        | 4.53E-03 |
| CDCA8        | 55143     | cell division cycle associated 8                                                                                                                      | 1.20        | 1.59E-03 |
| LAMA5        | 3911      | laminin, alpha 5                                                                                                                                      | 1.20        | 2.35E-03 |
| HYOU1        | 10525     | hypoxia up-regulated 1                                                                                                                                | 1.20        | 2.67E-03 |
| HS.143018    | —         | —                                                                                                                                                     | 1.20        | 3.51E-03 |
| FAHD2B       | 151313    | fumarylacetoacetate hydrolase domain containing 2B                                                                                                    | 1.20        | 4.76E-03 |
| ZBTB32       | 27033     | zinc finger and BTB domain containing 32                                                                                                              | 1.19        | 3.53E-04 |
| MGAT3        | 4248      | mannosyl (beta-1,4)-glycoprotein beta-1,4-N-acetylglucosaminyltransferase                                                                             | 1.19        | 6.72E-04 |
| ADAM19       | 8728      | ADAM metallopeptidase domain 19                                                                                                                       | 1.19        | 8.08E-04 |
| DCTN1        | 1639      | dynactin 1                                                                                                                                            | 1.19        | 1.48E-03 |
| SEMA3E       | 9723      | sema domain, immunoglobulin domain (Ig), short basic domain, secreted, (semaphorin) 3E                                                                | 1.19        | 1.52E-03 |
| GMPPA        | 29926     | GDP-mannose pyrophosphorylase A                                                                                                                       | 1.19        | 1.62E-03 |
| LOC651816    | 651816    | similar to Ubiquitin-conjugating enzyme E2S (Ubiquitin-conjugating enzyme E2-24 kDa) (Ubiquitin-protein ligase) (Ubiquitin carrier protein) (E2-EPF5) | 1.19        | 2.38E-03 |
| SEC61A1      | 29927     | Sec61 alpha 1 subunit ( <i>S. cerevisiae</i> )                                                                                                        | 1.19        | 2.40E-03 |
| EHP1L1       | 254102    | EH domain binding protein 1-like 1                                                                                                                    | 1.19        | 2.48E-03 |
| CIC          | 23152     | capicua homolog ( <i>Drosophila</i> )                                                                                                                 | 1.19        | 2.88E-03 |
| FLOT2        | 2319      | flotillin 2                                                                                                                                           | 1.19        | 3.25E-03 |
| RARA         | 5914      | retinoic acid receptor, alpha                                                                                                                         | 1.19        | 3.35E-03 |
| DUSP5        | 1847      | dual specificity phosphatase 5                                                                                                                        | 1.19        | 4.32E-03 |
| OR2AG1       | 144125    | olfactory receptor, family 2, subfamily AG, member 1                                                                                                  | 1.18        | 4.70E-04 |
| LOC399900    | 399900    | hypothetical LOC399900                                                                                                                                | 1.18        | 5.09E-04 |
| SPCS2        | 9789      | signal peptidase complex subunit 2 homolog ( <i>S. cerevisiae</i> )                                                                                   | 1.18        | 5.44E-04 |
| ZBP1         | 81030     | Z-DNA binding protein 1                                                                                                                               | 1.18        | 9.12E-04 |
| LOC399491    | 399491    | GPS, PLAT and transmembrane domain-containing protein                                                                                                 | 1.18        | 1.04E-03 |
| KIF20A       | 10112     | kinesin family member 20A                                                                                                                             | 1.18        | 2.68E-03 |
| COPG         | 22820     | coatamer protein complex, subunit gamma                                                                                                               | 1.18        | 2.79E-03 |
| OTUD5        | 55593     | OTU domain containing 5                                                                                                                               | 1.18        | 4.34E-03 |
| MYH9         | 4627      | myosin, heavy chain 9, nonmuscle                                                                                                                      | 1.18        | 4.81E-03 |
| SEC13        | 6396      | SEC13 homolog ( <i>S. cerevisiae</i> )                                                                                                                | 1.17        | 1.41E-03 |
| VPS8         | 23355     | vacuolar protein sorting 8 homolog ( <i>S. cerevisiae</i> )                                                                                           | 1.17        | 1.44E-03 |
| PARM1        | 25849     | prostate androgen-regulated mucin-like protein 1                                                                                                      | 1.17        | 1.47E-03 |
| SRPR         | 6734      | signal recognition particle receptor (docking protein)                                                                                                | 1.17        | 1.69E-03 |
| PIM2         | 11040     | pim-2 oncogene                                                                                                                                        | 1.17        | 2.01E-03 |
| TPX2         | 22974     | TPX2, microtubule-associated, homolog ( <i>Xenopus laevis</i> )                                                                                       | 1.17        | 2.10E-03 |
| LOC100130168 | 100130168 | hypothetical protein LOC100130168                                                                                                                     | 1.17        | 2.35E-03 |
| HS.562118    | —         | —                                                                                                                                                     | 1.17        | 2.59E-03 |
| NLRP1        | 22861     | NLR family, pyrin domain containing 1                                                                                                                 | 1.17        | 2.83E-03 |
| HS.569823    | —         | —                                                                                                                                                     | 1.17        | 2.89E-03 |
| KIAA0226     | 9711      | KIAA0226                                                                                                                                              | 1.17        | 2.93E-03 |
| TAP1         | 6890      | transporter 1, ATP-binding cassette, subfamily B (MDR/TAP)                                                                                            | 1.17        | 2.99E-03 |
| MLEC         | 9761      | malectin                                                                                                                                              | 1.17        | 3.23E-03 |
| CXXC1        | 30827     | CXXC finger protein 1                                                                                                                                 | 1.17        | 3.34E-03 |
| AARS         | 16        | alanyl-tRNA synthetase                                                                                                                                | 1.17        | 3.64E-03 |
| C1QB         | 713       | complement component 1, q subcomponent, B chain                                                                                                       | 1.17        | 4.08E-03 |
| KIAA0492     | 57238     | KIAA0492 protein                                                                                                                                      | 1.17        | 4.14E-03 |
| HS.447737    | —         | —                                                                                                                                                     | 1.17        | 4.58E-03 |
| HS.559654    | —         | —                                                                                                                                                     | 1.16        | 1.45E-03 |
| LOC728790    | 728790    | hypothetical LOC728790                                                                                                                                | 1.16        | 2.13E-03 |
| ALDH6A1      | 4329      | aldehyde dehydrogenase 6 family, member A1                                                                                                            | 1.16        | 2.62E-03 |
| IL4R         | 3566      | interleukin 4 receptor                                                                                                                                | 1.16        | 2.90E-03 |

| Gene symbol                       | EntrezID  | Gene name                                                                                | Fold-change | P-value  |
|-----------------------------------|-----------|------------------------------------------------------------------------------------------|-------------|----------|
| PDIA4                             | 9601      | protein disulfide isomerase family A, member 4                                           | 1.16        | 4.18E-03 |
| ALDH3B1                           | 221       | aldehyde dehydrogenase 3 family, member B1                                               | 1.16        | 4.67E-03 |
| ZNF486                            | 90649     | zinc finger protein 486                                                                  | 1.16        | 4.68E-03 |
| IRF9                              | 10379     | interferon regulatory factor 9                                                           | 1.16        | 4.76E-03 |
| TMEM106A                          | 113277    | transmembrane protein 106A                                                               | 1.16        | 4.78E-03 |
| INTS3                             | 65123     | integrator complex subunit 3                                                             | 1.15        | 1.11E-03 |
| SIL1                              | 64374     | SIL1 homolog, endoplasmic reticulum chaperone ( <i>S. cerevisiae</i> )                   | 1.15        | 2.09E-03 |
| FKBP2                             | 2286      | FK506 binding protein 2, 13kDa                                                           | 1.15        | 2.33E-03 |
| BTBD12                            | 84464     | SLX4 structure-specific endonuclease subunit homolog ( <i>S. cerevisiae</i> )            | 1.15        | 2.39E-03 |
| NFKB2                             | 4791      | nuclear factor of kappa light polypeptide gene enhancer in B-cells 2 (p49/p100)          | 1.15        | 3.36E-03 |
| SLC35B1                           | 10237     | solute carrier family 35, member B1                                                      | 1.15        | 4.01E-03 |
| C4ORF28                           | 133015    | PARK2 co-regulated-like                                                                  | 1.15        | 4.53E-03 |
| P4HB                              | 5034      | prolyl 4-hydroxylase, beta polypeptide                                                   | 1.15        | 4.73E-03 |
| PTK2B                             | 2185      | PTK2B protein tyrosine kinase 2 beta                                                     | 1.15        | 4.97E-03 |
| FBXO18                            | 84893     | F-box protein, helicase, 18                                                              | 1.14        | 5.80E-04 |
| LILRB1                            | 10859     | leukocyte immunoglobulin-like receptor, subfamily B (with TM and ITIM domains), member 1 | 1.14        | 2.05E-03 |
| PCYOX1                            | 51449     | prenylcysteine oxidase 1                                                                 | 1.14        | 2.52E-03 |
| CLPTM1L                           | 81037     | CLPTM1-like                                                                              | 1.14        | 3.02E-03 |
| FAM46A                            | 55603     | family with sequence similarity 46, member A                                             | 1.14        | 3.44E-03 |
| CAPN11                            | 11131     | calpain 11                                                                               | 1.14        | 4.04E-03 |
| EIF4G3                            | 8672      | eukaryotic translation initiation factor 4 gamma, 3                                      | 1.14        | 4.54E-03 |
| HS.188979                         | —         | —                                                                                        | 1.13        | 1.30E-03 |
| TRPM3                             | 80036     | transient receptor potential cation channel, subfamily M, member 3                       | 1.13        | 1.86E-03 |
| FLJ44124                          | 641737    | hypothetical LOC641737                                                                   | 1.13        | 2.25E-03 |
| FLJ20254                          | 54867     | transmembrane protein 214                                                                | 1.13        | 3.91E-03 |
| IFNAR2                            | 3455      | interferon (alpha, beta and omega) receptor 2                                            | 1.12        | 2.19E-03 |
| RCC2                              | 55920     | regulator of chromosome condensation 2                                                   | 1.12        | 3.84E-03 |
| SEC23B                            | 10483     | Sec23 homolog B ( <i>S. cerevisiae</i> )                                                 | 1.11        | 4.11E-03 |
| SHMT1                             | 6470      | serine hydroxymethyltransferase 1 (soluble)                                              | 1.10        | 3.67E-03 |
| <b>Down-Regulated Genes (136)</b> |           |                                                                                          |             |          |
| HOPX                              | 84525     | HOP homeobox                                                                             | -1.43       | 1.61E-04 |
| AKR1C3                            | 8644      | aldo-keto reductase family 1, member C3 (3-alpha hydroxysteroid dehydrogenase, type II)  | -1.41       | 4.83E-03 |
| POP5                              | 51367     | processing of precursor 5, ribonuclease P/MRP subunit ( <i>S. cerevisiae</i> )           | -1.37       | 5.03E-05 |
| RPL5                              | 6125      | ribosomal protein L5                                                                     | -1.35       | 3.27E-03 |
| LOC100133185                      | 100133185 | hypothetical LOC100133185                                                                | -1.33       | 4.76E-04 |
| LOC338870                         | 338870    | ribosomal protein S12 pseudogene 23                                                      | -1.32       | 8.62E-05 |
| C6ORF190                          | 387357    | thymocyte selection associated                                                           | -1.32       | 4.69E-04 |
| LOC391370                         | 391370    | ribosomal protein S12 pseudogene 4                                                       | -1.32       | 6.72E-04 |
| CD160                             | 11126     | CD160 molecule                                                                           | -1.32       | 2.00E-03 |
| ENPP4                             | 22875     | ectonucleotide pyrophosphatase/phosphodiesterase 4 (putative)                            | -1.32       | 2.40E-03 |
| GZMK                              | 3003      | granzyme K (granzyme 3; tryptase II)                                                     | -1.30       | 2.36E-03 |
| RCN2                              | 5955      | reticulocalbin 2, EF-hand calcium binding domain                                         | -1.30       | 3.32E-03 |
| TRAPPC2P1                         | 10597     | trafficking protein particle complex 2 pseudogene 1                                      | -1.30       | 4.15E-03 |
| CRYZ                              | 1429      | crystallin, zeta (quinone reductase)                                                     | -1.30       | 4.43E-03 |
| TMEM106B                          | 54664     | transmembrane protein 106B                                                               | -1.28       | 3.93E-04 |
| LOC441506                         | 441506    | similar to laminin receptor 1                                                            | -1.28       | 9.06E-04 |
| BMI1                              | 648       | BMI1 polycomb ring finger oncogene                                                       | -1.28       | 2.35E-03 |
| C17ORF45                          | 125144    | nonprotein coding RNA 188                                                                | -1.28       | 2.59E-03 |
| ZNF594                            | 84622     | zinc finger protein 594                                                                  | -1.27       | 5.38E-04 |
| FAU                               | 2197      | Finkel-Biskis-Reilly murine sarcoma virus (FBR-MuSV) ubiquitously expressed              | -1.27       | 1.39E-03 |
| LAIR2                             | 3904      | leukocyte-associated immunoglobulin-like receptor 2                                      | -1.27       | 2.09E-03 |
| RGS18                             | 64407     | regulator of G-protein signaling 18                                                      | -1.27       | 2.44E-03 |
| ANKRD46                           | 157567    | ankyrin repeat domain 46                                                                 | -1.27       | 3.68E-03 |
| C12ORF41                          | 54934     | chromosome 12 open reading frame 41                                                      | -1.25       | 2.88E-04 |
| LEPROTL1                          | 23484     | leptin receptor overlapping transcript-like 1                                            | -1.25       | 5.22E-04 |
| KLRD1                             | 3824      | killer cell lectin-like receptor subfamily D, member 1                                   | -1.25       | 6.85E-04 |
| DCK                               | 1633      | deoxycytidine kinase                                                                     | -1.25       | 3.00E-03 |
| ZCCHC7                            | 84186     | zinc finger, CCHC domain containing 7                                                    | -1.25       | 3.20E-03 |
| LOC100133662                      | 100133662 | hypothetical protein LOC100133662                                                        | -1.23       | 5.22E-04 |
| LOC388789                         | 388789    | hypothetical LOC388789                                                                   | -1.23       | 1.83E-03 |
| TGDS                              | 23483     | TDP-glucose 4,6-dehydratase                                                              | -1.23       | 2.73E-03 |
| TRIAP1                            | 51499     | TP53 regulated inhibitor of apoptosis 1                                                  | -1.23       | 3.11E-03 |
| CREBZF                            | 58487     | CREB/ATF bZIP transcription factor                                                       | -1.23       | 3.19E-03 |
| TAF7                              | 6879      | TAF7 RNA polymerase II, TATA box binding protein (TBP)-associated factor, 55kDa          | -1.23       | 3.97E-03 |
| PTGDR                             | 5729      | prostaglandin D2 receptor (DP)                                                           | -1.22       | 2.98E-04 |
| PTGER2                            | 5732      | prostaglandin E receptor 2 (subtype EP2), 53 kDa                                         | -1.22       | 9.34E-04 |



| Gene symbol  | EntrezID  | Gene name                                                                                                                                                                      | Fold-change | P-value  |
|--------------|-----------|--------------------------------------------------------------------------------------------------------------------------------------------------------------------------------|-------------|----------|
| CLNS1A       | 1207      | chloride channel, nucleotide-sensitive, 1A                                                                                                                                     | -1.22       | 1.65E-03 |
| GNG2         | 54331     | guanine nucleotide binding protein (G protein), gamma 2                                                                                                                        | -1.22       | 1.96E-03 |
| ZNF256       | 10172     | zinc finger protein 256                                                                                                                                                        | -1.22       | 3.28E-03 |
| LOC648249    | 648249    | similar to 40S ribosomal protein SA (p40) (34/67 kDa laminin receptor) (Colon carcinoma laminin-binding protein) (NEM/1CHD4) (Multidrug resistance-associated protein MGr1-Ag) | -1.22       | 4.09E-03 |
| CCL4L2       | 388372    | chemokine (C-C motif) ligand 4-like 2                                                                                                                                          | -1.20       | 1.94E-05 |
| C16ORF63     | 123811    | FGFR1OP N-terminal like                                                                                                                                                        | -1.20       | 1.76E-03 |
| C9ORF78      | 51759     | chromosome 9 open reading frame 78                                                                                                                                             | -1.20       | 1.83E-03 |
| LOC440055    | 440055    | ribosomal protein S12 pseudogene 22                                                                                                                                            | -1.20       | 2.30E-03 |
| MOC52        | 4338      | molybdenum cofactor synthesis 2                                                                                                                                                | -1.20       | 2.59E-03 |
| BBS10        | 79738     | Bardet-Biedl syndrome 10                                                                                                                                                       | -1.20       | 3.02E-03 |
| ZNF32        | 7580      | zinc finger protein 32                                                                                                                                                         | -1.20       | 3.19E-03 |
| TSPAN13      | 27075     | tetraspanin 13                                                                                                                                                                 | -1.20       | 4.00E-03 |
| ZNF480       | 147657    | zinc finger protein 480                                                                                                                                                        | -1.19       | 1.73E-04 |
| MED30        | 90390     | mediator complex subunit 30                                                                                                                                                    | -1.19       | 3.47E-04 |
| AQP12B       | 653437    | aquaporin 12B                                                                                                                                                                  | -1.19       | 9.56E-04 |
| FAM179A      | 165186    | family with sequence similarity 179, member A                                                                                                                                  | -1.19       | 1.19E-03 |
| ZNF550       | 162972    | zinc finger protein 550                                                                                                                                                        | -1.19       | 2.44E-03 |
| COX7A2L      | 9167      | cytochrome c oxidase subunit VIIa polypeptide 2 like                                                                                                                           | -1.19       | 2.58E-03 |
| FLJ14213     | 79899     | proline rich 5 like                                                                                                                                                            | -1.19       | 2.81E-03 |
| HSF2         | 3298      | heat shock transcription factor 2                                                                                                                                              | -1.19       | 2.99E-03 |
| ARL6IP5      | 10550     | ADP-ribosylation-like factor 6 interacting protein 5                                                                                                                           | -1.19       | 3.39E-03 |
| LEM3         | 23592     | LEM domain containing 3                                                                                                                                                        | -1.19       | 3.41E-03 |
| CXCR7        | 57007     | chemokine (C-X-C motif) receptor 7                                                                                                                                             | -1.19       | 3.50E-03 |
| SNORD21      | 6083      | small nucleolar RNA, C/D box 21                                                                                                                                                | -1.19       | 4.02E-03 |
| C1ORF52      | 148423    | chromosome 1 open reading frame 52                                                                                                                                             | -1.19       | 4.65E-03 |
| KCTD5        | 54442     | potassium channel tetramerisation domain containing 5                                                                                                                          | -1.18       | 2.35E-04 |
| SMARCE1      | 6605      | SWI/SNF related, matrix associated, actin dependent regulator of chromatin, subfamily e, member 1                                                                              | -1.18       | 2.56E-04 |
| C7ORF70      | 84792     | chromosome 7 open reading frame 70                                                                                                                                             | -1.18       | 7.11E-04 |
| CYP2R1       | 120227    | cytochrome P450, family 2, subfamily R, polypeptide 1                                                                                                                          | -1.18       | 7.45E-04 |
| HSF5         | 124535    | heat shock transcription factor family member 5                                                                                                                                | -1.18       | 1.40E-03 |
| LOC641844    | 641844    | SDHDP2 succinate dehydrogenase complex, subunit D, integral membrane protein pseudogene 2                                                                                      | -1.18       | 1.44E-03 |
| CD226        | 10666     | CD226 molecule                                                                                                                                                                 | -1.18       | 1.74E-03 |
| C1ORF75      | 55248     | transmembrane protein 206                                                                                                                                                      | -1.18       | 1.75E-03 |
| STK39        | 27347     | serine threonine kinase 39                                                                                                                                                     | -1.18       | 2.07E-03 |
| METTL4       | 64863     | methyltransferase like 4                                                                                                                                                       | -1.18       | 2.10E-03 |
| LOC401206    | 401206    | ribosomal protein S25 pseudogene 6                                                                                                                                             | -1.18       | 2.70E-03 |
| MIS12        | 79003     | MIS12, MIND kinetochore complex component, homolog (S. pombe)                                                                                                                  | -1.18       | 3.11E-03 |
| C3ORF10      | 55845     | chromosome 3 open reading frame 10                                                                                                                                             | -1.18       | 3.86E-03 |
| CRIP1        | 9419      | cysteine-rich PDZ-binding protein                                                                                                                                              | -1.18       | 3.99E-03 |
| RPS13        | 6207      | ribosomal protein S13                                                                                                                                                          | -1.18       | 3.99E-03 |
| SEN7         | 57337     | SUMO1/sentrin specific peptidase 7                                                                                                                                             | -1.18       | 4.09E-03 |
| SLFN12       | 55106     | schlafen family member 12                                                                                                                                                      | -1.16       | 5.86E-04 |
| SLC27A5      | 10998     | solute carrier family 27 (fatty acid transporter), member 5                                                                                                                    | -1.16       | 6.83E-04 |
| LOC100130154 | 100130154 | similar to thymosin, beta 10                                                                                                                                                   | -1.16       | 1.32E-03 |
| PRKAB2       | 5565      | protein kinase, AMP-activated, beta 2 noncatalytic subunit                                                                                                                     | -1.16       | 1.35E-03 |
| RPA2         | 6118      | replication protein A2, 32 kDa                                                                                                                                                 | -1.16       | 1.41E-03 |
| MED4         | 29079     | mediator complex subunit 4                                                                                                                                                     | -1.16       | 1.85E-03 |
| FASLG        | 356       | Fas ligand (TNF superfamily, member 6)                                                                                                                                         | -1.16       | 1.89E-03 |
| MS4A1        | 931       | membrane-spanning 4-domains, subfamily A, member 1                                                                                                                             | -1.16       | 2.50E-03 |
| HS.25318     |           | —                                                                                                                                                                              | -1.16       | 2.69E-03 |
| LOC100127918 | 100127918 | similar to small ubiquitin-related modifier 2                                                                                                                                  | -1.16       | 3.51E-03 |
| RAB11A       | 8766      | RAB11A, member RAS oncogene family                                                                                                                                             | -1.16       | 4.00E-03 |
| KPNA5        | 3841      | karyopherin alpha 5 (importin alpha 6)                                                                                                                                         | -1.16       | 4.45E-03 |
| SETMAR       | 6419      | SET domain and mariner transposase fusion gene                                                                                                                                 | -1.16       | 4.67E-03 |
| SMYD2        | 56950     | SET and MYND domain containing 2                                                                                                                                               | -1.15       | 6.80E-04 |
| KLHDC5       | 57542     | kelch domain containing 5                                                                                                                                                      | -1.15       | 1.47E-03 |
| TMEM9B       | 56674     | TMEM9 domain family, member B                                                                                                                                                  | -1.15       | 1.76E-03 |
| ZNF304       | 57343     | zinc finger protein 304                                                                                                                                                        | -1.15       | 1.82E-03 |
| GK5          | 256356    | glycerol kinase 5 (putative)                                                                                                                                                   | -1.15       | 2.55E-03 |
| SOCS2        | 8835      | suppressor of cytokine signaling 2                                                                                                                                             | -1.15       | 2.63E-03 |
| LOC347292    | 347292    | ribosomal protein L36 pseudogene 14                                                                                                                                            | -1.15       | 2.72E-03 |
| C11ORF46     | 120534    | chromosome 11 open reading frame 46                                                                                                                                            | -1.15       | 3.32E-03 |
| STX16        | 8675      | syntaxin 16                                                                                                                                                                    | -1.15       | 3.74E-03 |
| VAMP4        | 8674      | vesicle-associated membrane protein 4                                                                                                                                          | -1.15       | 4.00E-03 |
| C1ORF131     | 128061    | chromosome 1 open reading frame 131                                                                                                                                            | -1.15       | 4.00E-03 |
| LTBP2        | 4053      | latent transforming growth factor beta binding protein 2                                                                                                                       | -1.15       | 4.01E-03 |
| PQLC3        | 130814    | PQ loop repeat containing 3                                                                                                                                                    | -1.15       | 4.07E-03 |
| ZNF187       | 7741      | zinc finger protein 187                                                                                                                                                        | -1.15       | 4.26E-03 |

| Gene symbol  | EntrezID  | Gene name                                                                                       | Fold-change | P-value  |
|--------------|-----------|-------------------------------------------------------------------------------------------------|-------------|----------|
| NGRN         | 51335     | neugrin, neurite outgrowth associated                                                           | -1.15       | 4.30E-03 |
| RHEB         | 6009      | Ras homolog enriched in brain                                                                   | -1.15       | 4.47E-03 |
| HS.133324    |           | —                                                                                               | -1.15       | 4.58E-03 |
| SNORA76      | 677842    | small nucleolar RNA, H/ACA box 76                                                               | -1.15       | 4.59E-03 |
| SERPINE2     | 5270      | serpin peptidase inhibitor, clade E (nexin, plasminogen activator inhibitor type 1), member 2   | -1.14       | 1.28E-03 |
| ERP27        | 121506    | endoplasmic reticulum protein 27                                                                | -1.14       | 1.32E-03 |
| CCL3L1       | 6349      | chemokine (C-C motif) ligand 3-like 1                                                           | -1.14       | 1.33E-03 |
| MLLT11       | 10962     | myeloid/lymphoid or mixed-lineage leukemia (trithorax homolog, Drosophila); translocated to, 11 | -1.14       | 1.40E-03 |
| AASDHPPT     | 60496     | aminoadipate-semialdehyde dehydrogenase-phosphopantetheinyl transferase                         | -1.14       | 1.53E-03 |
| C20ORF30     | 29058     | chromosome 20 open reading frame 30                                                             | -1.14       | 1.67E-03 |
| LOC642341    | 642341    | hypothetical LOC642341                                                                          | -1.14       | 1.99E-03 |
| VTA1         | 51534     | Vps20-associated 1 homolog (S. cerevisiae)                                                      | -1.14       | 2.43E-03 |
| MFSD6        | 54842     | major facilitator superfamily domain containing 6                                               | -1.14       | 2.44E-03 |
| KBTBD6       | 89890     | kelch repeat and BTB (POZ) domain containing 6                                                  | -1.14       | 2.59E-03 |
| LOC731915    | 731915    | similar to ATP-binding cassette sub-family D member 1 (Adrenoleukodystrophy protein) (ALDP)     | -1.14       | 2.61E-03 |
| CCL3L3       | 414062    | chemokine (C-C motif) ligand 3-like 3                                                           | -1.14       | 2.80E-03 |
| LOC100130633 | 100130633 | hypothetical protein LOC100130633                                                               | -1.14       | 2.93E-03 |
| CCNB1IP1     | 57820     | cyclin B1 interacting protein 1, E3 ubiquitin protein ligase                                    | -1.14       | 3.62E-03 |
| PPIA         | 5478      | peptidylprolyl isomerase A (cyclophilin A)                                                      | -1.14       | 3.96E-03 |
| MST4         | 51765     | serine/threonine protein kinase MST4                                                            | -1.14       | 4.95E-03 |
| ZXDB         | 158586    | zinc finger, X-linked, duplicated B                                                             | -1.12       | 1.34E-03 |
| NUDT11       | 55190     | nudix (nucleoside diphosphate linked moiety X)-type motif 11                                    | -1.12       | 2.81E-03 |
| BCL2L13      | 23786     | BCL2-like 13 (apoptosis facilitator)                                                            | -1.12       | 3.02E-03 |
| PALB2        | 79728     | partner and localizer of BRCA2                                                                  | -1.12       | 3.05E-03 |
| C9ORF85      | 138241    | chromosome 9 open reading frame 85                                                              | -1.12       | 3.09E-03 |
| MRPS36       | 92259     | mitochondrial ribosomal protein S36                                                             | -1.12       | 3.12E-03 |
| LYRM4        | 57128     | LYR motif containing 4                                                                          | -1.12       | 3.17E-03 |
| MFF          | 56947     | mitochondrial fission factor                                                                    | -1.12       | 3.46E-03 |
| MRPS17       | 51373     | mitochondrial ribosomal protein S17                                                             | -1.12       | 3.89E-03 |
| HS.581615    |           | —                                                                                               | -1.12       | 4.81E-03 |
| DNAJA4       | 55466     | DnaJ (Hsp40) homolog, subfamily A, member 4                                                     | -1.12       | 4.94E-03 |
| FBXO3        | 26273     | F-box protein 3                                                                                 | -1.11       | 4.47E-03 |

\*Determined by pairwise comparisons at  $P < 0.005$  with 256 available permutations using the BRB-ArrayTools ( $n = 9$ ).

**Table S4. Cis-regulatory elements enriched in the putative promoter regions (-1,000 ~ +200) of genes responsive to dietary zinc depletion, identified by promoter integration in microarray analysis (PRIMA) of EXPANDER with zinc-responsive genes determined by a pairwise comparison ( $P < 0.005$ )†**

| Transcription factor           | TRANSFAC ID | P-value | Enrichment factor* | Target gene (location of putative TF binding site)                                                                                                                                                                                                                                                                                                                                                                                                                                                                                                                                                                                                                                                                                                               |
|--------------------------------|-------------|---------|--------------------|------------------------------------------------------------------------------------------------------------------------------------------------------------------------------------------------------------------------------------------------------------------------------------------------------------------------------------------------------------------------------------------------------------------------------------------------------------------------------------------------------------------------------------------------------------------------------------------------------------------------------------------------------------------------------------------------------------------------------------------------------------------|
| Up-regulated genes (cluster 1) |             |         |                    |                                                                                                                                                                                                                                                                                                                                                                                                                                                                                                                                                                                                                                                                                                                                                                  |
| NF- $\kappa$ B                 | M00287      | 5.98E-7 | 1.692              | PDIA4(-61,-41,104), SPC24(-213,-115), NUSAP1(-59), CDCA5(-745), CIC(-765,-716), CDC45L(158), AARS(-51), TPX2(99,135), AURKA(-11,21), RRB1(-60), SLC38A10(-85), SHMT1(-39), SDF2L1(-138,-19), UHRF1(-88), ALDH6A1(-226,-134,-91,-33,-5), FAM46A(-737), TK1(98,129), KIF20A(41), HSP90B1(-171,-118), SRPR(-257,-156), MCM4(-59), CDCA8(17), CXXC1(-923), MGC29506(-50), NARF(-122,-82,-46,-6), PRR11(-479,-345,-254,-133,-105,-39), PIM2(-124), UBE2C(-68,-37), SLC1A4(-181), CCNA2(-82), BUB1(-61,-35), GLDC(-97), SORT1(-189,-128), P4HB(-256,-140), MAGT1(-216,-169,-79), AURKB(-92), OTUD5(-847,-480), CCNB2(-100,-67), MLEC(-647,-129,-73), OXCT2(-294), TRPM3(-125), CDC20(-79,-34), SPCS2(-52), FBXO18(-97), PTK2B(133), DLGAP5(1,66), GMPPB(-190,-124,-51) |
| AP-2 $\alpha$                  | M00469      | 0.0020  | 1.605              | HYOU1(-240), ALOX5(-137), CLPTM1L(-811,-416), NUSAP1(-362), CIC(-771,-527,-490,-63), CDC45L(-423), RRB1(-523), TXNDC11(15), TRAM2(-444,-395,-247), SLC38A10(-184), SDF2L1(55), ARID3A(-432,-237), FAM46A(-639), C19ORF10(-66), KIF1B(-403), DUSP5(-61), UBE2J1(-193), HSP90B1(-820), SRPR(-116), NARF(-539), PIM2(106), CDT1(-334), NLRP1(76), UBE2C(-336), SLC1A4(-656,60), SORT1(-296), P4HB(-703), MCM2(-133), OTUD5(-334), OXCT2(36), TLN1(-323), PTK2B(-277), DLGAP5(-158), APOBEC3B(-125), LAMA5(-213), NFKB2(-435), GMPPA(-678), GMPPB(-510)                                                                                                                                                                                                              |

| Transcription factor             | TRANSFAC ID | P-value | Enrichment factor* | Target gene (location of putative TF binding site)                                                                                                                                                                                                                                                                                                                                                                                                                                                                                                                                                                                                                                                                                                                                                                                                                                                                                                                                                                                                                                                                                                  |
|----------------------------------|-------------|---------|--------------------|-----------------------------------------------------------------------------------------------------------------------------------------------------------------------------------------------------------------------------------------------------------------------------------------------------------------------------------------------------------------------------------------------------------------------------------------------------------------------------------------------------------------------------------------------------------------------------------------------------------------------------------------------------------------------------------------------------------------------------------------------------------------------------------------------------------------------------------------------------------------------------------------------------------------------------------------------------------------------------------------------------------------------------------------------------------------------------------------------------------------------------------------------------|
| ETF                              | M00695      | 9.4E-4  | 1.374              | PDIA4(-126,50), ALOX5(-911,-708,52), MTF1(-518), TYMS(-51,52,80,114), BIRC5(-52,110), ZYX(-541,15), CDC45L(-300,-285,199), TPX2(200), MGAT3(97,142), TRAM2(-469), SEC23B(-95), SDF2L1(29), UHRF1(18), SEC13(108), COL18A1(10), UBE2J1(-92), SRPR(-9), SPATS2(-430,-414), CDT1(46), PIM2(-401), SLC1A4(-208,-195), FAHD2B(-146,126,135), BIK(43), SLC35B1(-416,27), P4HB(-459), KIAA0226(-246,25), EHBP1L1(104), ADAM19(53), DENND5B(-114,37,148,157), KIF2C(-37), OTUD5(-408), TRPM3(-211,-91), FBXO18(-279,-60,-38), C4ORF28(-106), LAMA5(-969,15), ITM2C(52), SORL1(-723,86), HYOU1(-131), TRIP13(-315,-295,64), CKAP4(-211,-116), FLOT2(-132), CLPTM1L(-204,-87,-68), CIC(-745,-724,-468), AARS(-76), STT3A(-732), RRPB1(-118,193), TXNDC11(22), SLC38A10(4), SHMT1(-101,92,142), SIL1(17,47), IFNAR2(164), TK1(116), KIF1B(-928,-846,-732,-445), DUSP5(105), HSP90B1(-318), ZNF341(101), MCM4(-724), CDCA8(-56), ABCG1(-110), NARF(-438,-222,-213,126), BTBD12(10), PRR11(-709,-550), CCNA2(-30), BUB1(-39,34), UBA1(86,151), BMP8B(-243,198), MLEC(-227,-37), MYH9(89), CDC20(-305,-139), POLR2A(-388), GMPPA(-867), SEC61A1(176), GMPBP(-486) |
| Down-regulated genes (cluster 2) |             |         |                    |                                                                                                                                                                                                                                                                                                                                                                                                                                                                                                                                                                                                                                                                                                                                                                                                                                                                                                                                                                                                                                                                                                                                                     |
| Elk-1                            | M00025      | 0.0020  | 1.628              | LEMD3(-38), TMEM9B(-2), CREBZF(-905), ZNF256(-149), VTA1(-45), KCTD5(-124,9), CRYZ(-273), C9ORF78(6), ZNF594(-176,12), PQLC3(-731), LEPROTL1(-21), SLFN12(-748), RAB11A(-732,-223,-17), C1ORF52(-22,-1), PALB2(-116), SENP7(-123,-93), TAF7(-257), FLJ14213(-411), C20ORF30(-39), ZCCHC7(-6), COX7A2L(-778), ZNF550(-23), CRIPT(-3), MIS12(-92,-74)                                                                                                                                                                                                                                                                                                                                                                                                                                                                                                                                                                                                                                                                                                                                                                                                 |
| TEF                              | M00672      | 0.0030  | 1.621              | C6ORF190(-38), ZNF187(-202,-140), PTGER2(-968,-827), KLRD1(-605), MS4A1(-547), GZMK(-451,-47), C9ORF78(-906), CCNB1IP1(-86), ZNF594(-951), TSPAN13(-553), RAB11A(-845), TAF7(-981,-876), RGS18(-306,49), SETMAR(-155), ERP27(-836,-181), FASLG(-286), AKR1C3(-172,-10), GNG2(-969), HOPX(-548), GK5(-667)                                                                                                                                                                                                                                                                                                                                                                                                                                                                                                                                                                                                                                                                                                                                                                                                                                           |

\*Ratio of prevalence of TF hits in the cluster to that in all genes.

†Threshold P-value for significance was set at 0.005.

**Table S5. Top five functions enriched among the genes positively and negatively responsive to acute dietary zinc depletion, respectively†**

| Functional category                           | P-value*            | Gene list                                                                                                                                                                                                                                                                                                                                                                                                                                                                                                                                                                                      |
|-----------------------------------------------|---------------------|------------------------------------------------------------------------------------------------------------------------------------------------------------------------------------------------------------------------------------------------------------------------------------------------------------------------------------------------------------------------------------------------------------------------------------------------------------------------------------------------------------------------------------------------------------------------------------------------|
| Up-regulated genes                            |                     |                                                                                                                                                                                                                                                                                                                                                                                                                                                                                                                                                                                                |
| Cell cycle                                    | 1.03E-08 ~ 1.64E-02 | KIF20A, DLGAP5, CDC20, CDT1, NCAPG, CCNB2, AURKB, BIRC5, CCNA2, RARA, TOP2A, CD38, HJURP, CDCA5, KIF2C, TYMS, CDC45, TRIP13, NUSAP1, IL4R, CDCA8, IRF9, AURKA, TPX2, ARID3A, BUB1, MCM2, WAS, BIK, MYH9, DCTN1, PIM2, UBE2C                                                                                                                                                                                                                                                                                                                                                                    |
| Cellular assembly and organization            | 1.9E-08 ~ 1.64E-02  | DLGAP5, PTK2B, CDT1, KIF1B, NCAPG, CCNB2, AURKB, TAP1, MCM4, ABCA1, BIRC5, CCNA2, TOP2A, HJURP, KIF2C, COL18A1, RRPB1, NUSAP1, UHRF1, AURKA, LILRB1, TPX2, BUB1, WAS, DCTN1, MYH9, ZYX                                                                                                                                                                                                                                                                                                                                                                                                         |
| DNA replication, recombination, and repair    | 1.9E-08 ~ 1.64E-02  | DLGAP5, PTK2B, CDT1, NCAPG, CCNB2, MCM4, BIRC5, INTS3, CCNA2, RARA, TOP2A, CDCA5, HJURP, KIF2C, TYMS, CDC45, TRIP13, NUSAP1, SLX4, AURKA, TPX2, BUB1, MCM2, BIK, ALOX5, TK1                                                                                                                                                                                                                                                                                                                                                                                                                    |
| Cancer                                        | 1.88E-07 ~ 1.75E-02 | DLGAP5, KIF1B, NLRP7, NCAPG, NLRP1, CCNB2, ABCG1, AURKB, BIRC5, RARA, VPS8, SLC2A5, TYMS, IL4R, P4HB, CDCA8, EIF4G3, AURKA, NFKB2, IFNAR2, TPX2, CCR9, ZYX, ALOX5, TK1, UBE2C, KIF20A, TCF4, SLC1A4, CDC20, HYOU1, SPC24, SIL1, MCM4, IGLL1/IGLL5, MGAT3, CCNA2, DUSP5, HSP90B1, POLR2A, F5, PHGDH, TOP2A, CD38, CDCA5, SORT1, COL18A1, TRIP13, LAMA5, NUSAP1, IRF4, UHRF1, ARID3A, BUB1, SDF2L1, MCM2, IGJ, UBA1, TNFRSF13B, PIM2                                                                                                                                                             |
| Genetic Disorder                              | 7.69E-07 ~ 1.72E-02 | DLGAP5, KIF1B, SLC38A10, NLRP1, CCNB2, ABCG1, TLN1, AURKB, ABCA1, BIRC5, TNFRSF17, INTS3, RARA, ALDH6A1, TYMS, PDIA5, IL4R, P4HB, CDCA8, SORL1, MAGT1, EIF4G3, AURKA, ZBTB43, NFKB2, IFNAR2, LILRB1, CCR9, FLOT2, ZYX, ALDH3B1, ALOX5, PACRGL, TK1, UBE2C, TCF4, SLC1A4, PTK2B, CDC20, CKAP4, SIL1, MCM4, IGLL1/IGLL5, TRPM3, CCNA2, DUSP5, HSP90B1, SEC61A1, POLR2A, F5, SEC23B, ADAM19, TOP2A, PHGDH, CD38, SORT1, HJURP, CDCA5, SEMA4A, COL18A1, SEMA3E, TRIP13, CDC45, CIC, LAMA5, IRF4, UHRF1, SLC35B1, COPG, SDF2L1, MCM2, WAS, IGJ, MYH9, DCTN1, SLC12A9, SPATS2, UBA1, TNFRSF13B, GLDC |
| Down-regulated genes                          |                     |                                                                                                                                                                                                                                                                                                                                                                                                                                                                                                                                                                                                |
| Cell death                                    | 1.02E-04 ~ 4.93E-02 | CLNS1A, SETMAR, GZMK, CD160, DCK, PTGDR, KLRD1, SOCS2, HSF2, MS4A1, SMARCE1, SEDLP, SERPINE2, MST4, BCL2L13, FAU, BMI1, PPIA, CD226, CCL3L1/CCL3L3, GNG2, TRIAP1, PTGER2, FASLG                                                                                                                                                                                                                                                                                                                                                                                                                |
| Cell-mediated immune response                 | 1.02E-04 ~ 4.05E-02 | KLRD1, CD226, CCL3L1/CCL3L3, FASLG                                                                                                                                                                                                                                                                                                                                                                                                                                                                                                                                                             |
| Cellular development                          | 1.02E-04 ~ 4.55E-02 | AKR1C3, KLRD1, STK39, SMARCE1, TSPAN13, TAF7, MST4, BMI1, CXCR7, PPIA, CD226, PTGER2, FASLG                                                                                                                                                                                                                                                                                                                                                                                                                                                                                                    |
| Cellular function and maintenance             | 1.02E-04 ~ 4.55E-02 | KLRD1, PPIA, HSF2, CRIPT, SMARCE1, CD226, PTGER2, FASLG                                                                                                                                                                                                                                                                                                                                                                                                                                                                                                                                        |
| Hematological system development and function | 1.02E-04 ~ 4.55E-02 | CLNS1A, BMI1, PTGDR, CXCR7, KLRD1, PPIA, SOCS2, CD226, CCL3L1/CCL3L3, PTGER2, FASLG, SERPINE2                                                                                                                                                                                                                                                                                                                                                                                                                                                                                                  |

\*Range of Fisher's exact test P-values of functional annotations assigned to each respective functional category.

†Differentially expressed genes determined by a pairwise comparison ( $P < 0.005$ ) were filtered by their mode of responses and overrepresented biological functions were identified by ingenuity pathway analysis

**Table S6. Genes holding the potential as an indicator of dietary zinc deficiency in individuals\***

| Gene Symbol | Entrez ID | Gene Name                                                                                 | Fold-Change (ZnD/Baseline) | P-Value  |
|-------------|-----------|-------------------------------------------------------------------------------------------|----------------------------|----------|
| CDC20       | 991       | cell division cycle 20 homolog ( <i>S. cerevisiae</i> )                                   | 2.69                       | 2.00E-07 |
| TXNDC5      | 81567     | thioredoxin domain containing 5 (endoplasmic reticulum)                                   | 2.73                       | 5.00E-07 |
| MZB1        | 51237     | marginal zone B and B1 cell-specific protein                                              | 2.07                       | 7.00E-07 |
| IGJ         | 3512      | immunoglobulin J polypeptide, linker protein for immunoglobulin alpha and mu polypeptides | 4.22                       | 1.00E-06 |
| IGLL1       | 3543      | immunoglobulin lambda-like polypeptide 1                                                  | 2.77                       | 1.00E-06 |
| CD38        | 952       | CD38 molecule                                                                             | 2.03                       | 2.07E-05 |
| GLDC        | 2731      | glycine dehydrogenase (decarboxylating)                                                   | 2.49                       | 2.30E-06 |
| TNFRSF17    | 608       | tumor necrosis factor receptor superfamily, member 17                                     | 2.55                       | 1.85E-05 |

\*Baseline and post-zinc-depletion values were grouped as to represent zinc-adequate (ZnA) and zinc-deficient (ZnD) conditions. Total of eight well-characterized genes were identified to be significantly different between each group ( $P < 0.005$  by t-test without pairing) with a fold-change larger than two ( $n = 9$ ).

**Table S7. Dietary components of the liquid diet for the zinc-depletion phase**

| Dietary components of the liquid diet for the zinc-depletion phase |                                             |                           |
|--------------------------------------------------------------------|---------------------------------------------|---------------------------|
| Component                                                          | Mineral Content                             | Amount per kg Diet        |
| Egg white                                                          |                                             | 129 g                     |
| Cornstarch                                                         |                                             | 300 g                     |
| Maltose-dextrin                                                    |                                             | 300 g                     |
| Sucrose                                                            |                                             | 60 g                      |
| Corn oil                                                           |                                             | 151 g                     |
| Cellulose                                                          |                                             | 10 g                      |
| Mineral mixture                                                    | Sodium chloride                             | 9.8 g Na                  |
|                                                                    | Calcium carbonate                           | 10.0 g Ca                 |
|                                                                    | Potassium phosphate, monobasic <sup>a</sup> | 3.8 g P <sup>a+b</sup>    |
|                                                                    | Potassium phosphate, dibasic <sup>b</sup>   | 12.0 g K <sup>a+b+c</sup> |
|                                                                    | Potassium chloride <sup>c</sup>             |                           |
|                                                                    | Magnesium carbonate·5H <sub>2</sub> O       | 1.28 g Mg                 |
|                                                                    | Ferric citrate·6H <sub>2</sub> O            | 57.6 mg Fe                |
|                                                                    | Copper sulfate·5H <sub>2</sub> O            | 7.6 mg Cu                 |
|                                                                    | Potassium iodate                            | 0.50 mg I                 |
|                                                                    | Manganese chloride                          | 11.4 mg Mn                |
| Glucose                                                            |                                             | 16.8 g                    |

\* Sufficient energy intakes were ensured by supplemental mineral-free energy shakes. The caloric and mineral contents of the liquid formula were similar to those used in previous dietary zinc studies (1, 2).

**Table S8 Mineral contents of the acclimation and zinc-repletion diets measured by inductively coupled plasma optical emission spectrophotometry**

Mineral contents of the acclimation and zinc-repletion diets

| Minerals per day | Dietary phase |              |
|------------------|---------------|--------------|
|                  | Acclimation   | Depletion    |
| g Calcium        | 1.134         | 2.994        |
| g Phosphorus     | 2.048         | 1.390        |
| g Magnesium      | 0.343         | 0.509        |
| g Potassium      | 3.259         | 4.417        |
| g Sodium         | 3.208         | 5.038        |
| g Sulfur         | 1.302         | 1.319        |
| mg Copper        | 1.818         | 1.539        |
| mg Iron          | 25.014        | 25.988       |
| <b>mg Zinc</b>   | <b>10.415</b> | <b>0.296</b> |
| mg Manganese     | 3.533         | 3.828        |

\*Care was taken to minimize the difference in the daily intake of each mineral with the exception of zinc. To minimize the bioavailability of zinc, 1.4 g/d of sodium phytate from rice (Sigma) was supplemented to the formula. Carboxymethyl cellulose (2 g/d; TIC Gums) was added to prevent bowel discomfort that could be caused by the liquid diet. Supplemental biotin (2 mg/d) was provided to ensure sufficient biotin absorption because of the avidin from egg white in the liquid diet. A multivitamin supplement (CVS) was given. Distilled water (Zephyrhills), Diet Pepsi, and Sierra Mist (Pepsico), of which zinc contents were undetectable by flame atomic absorption spectrophotometry (AAS), were provided throughout the first two phases. For zinc repletion, zinc monomethionate (15 mg Zn/d; Jarrow) was consumed in addition to the subject's self-selected habitual diets. An anonymous questionnaire of compliance was provided to identify any major deviations from the protocol at the end of the study. Serum zinc concentrations were monitored throughout the study to verify compliance.
